# Supplementary material for: Cell Walls of Saccharomyces cerevisiae Differentially Modulated Innate Immunity and Glucose Metabolism during Late Systemic Inflammation
Source: PubMed Central journal article supplement (PMC3260269; doi:10.1371/journal.pone.0030323), 2012-01-17

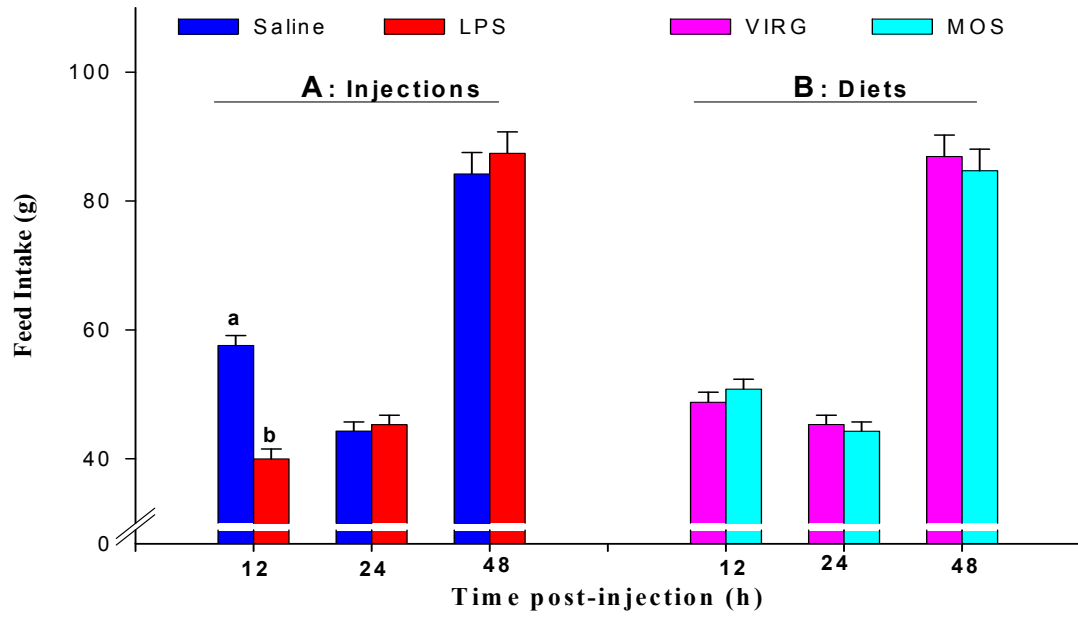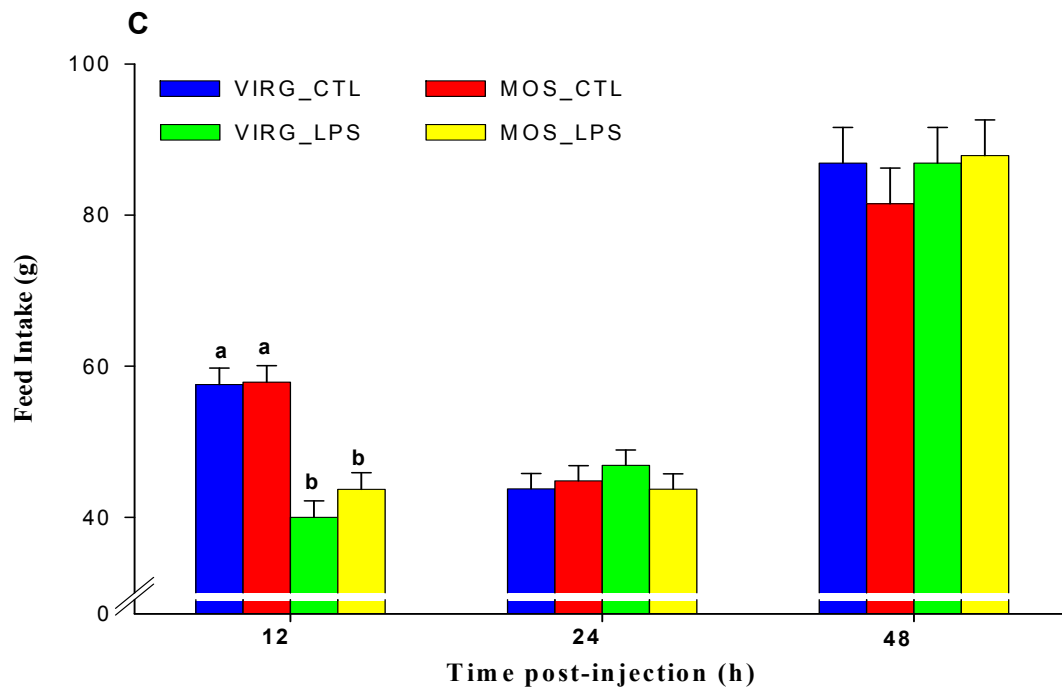

Supplement: pone.0030323.s002.pdf [file pone.0030323.s002.pdf]
